# Supplementary material for: Generation of functional thymic organoids from human pluripotent stem cells
Source: PubMed Central journal article supplement — Stem Cell Reports. 2023 Mar 23;18(4):829–40. doi: 10.1016/j.stemcr.2023.02.013 (PMC10147832; doi:10.1016/j.stemcr.2023.02.013), 2023-03-23
Supplement: mmc1.pdf [file mmc1.pdf]

**Stem Cell Reports, Volume 18**

**Supplemental Information**

**Generation of functional thymic organoids from human pluripotent stem cells**

**Stephan A. Ramos, Lucas H. Armitage, John J. Morton, Nathaniel Alzofon, Diana Handler, Geoffrey Kelly, Dirk Homann, Antonio Jimeno, and Holger A. Russ**

**Supplementary Information:  
Supplementary Figures**

| Conditions | Stage 1                    | Stage 2                | Stage 3                            |
|------------|----------------------------|------------------------|------------------------------------|
| 1          | Wnt3a d0; ActA d0-4; RA d4 | BMP4, RA, LY, SAG d5-8 | BMP4, RA, LY, Wnt3a, FGF8, SANT1   |
| 2          | Wnt3a d0; ActA d0-4; RA d4 | BMP4, RA, LY, SAG d5-8 | LDN, RA, Wnt3a, FGF8, SANT1, ActA  |
| 3          | Wnt3a d0; ActA d0-4; RA d4 | BMP4, RA, LY, SAG d5-8 | BMP4, RA, Wnt3a, FGF8, SANT1, ActA |
| 4          | Wnt3a d0; ActA d0-4; RA d4 | BMP4, RA, LY, SAG d5-8 | LDN, RA, LY, Wnt3a, FGF8, SANT1    |

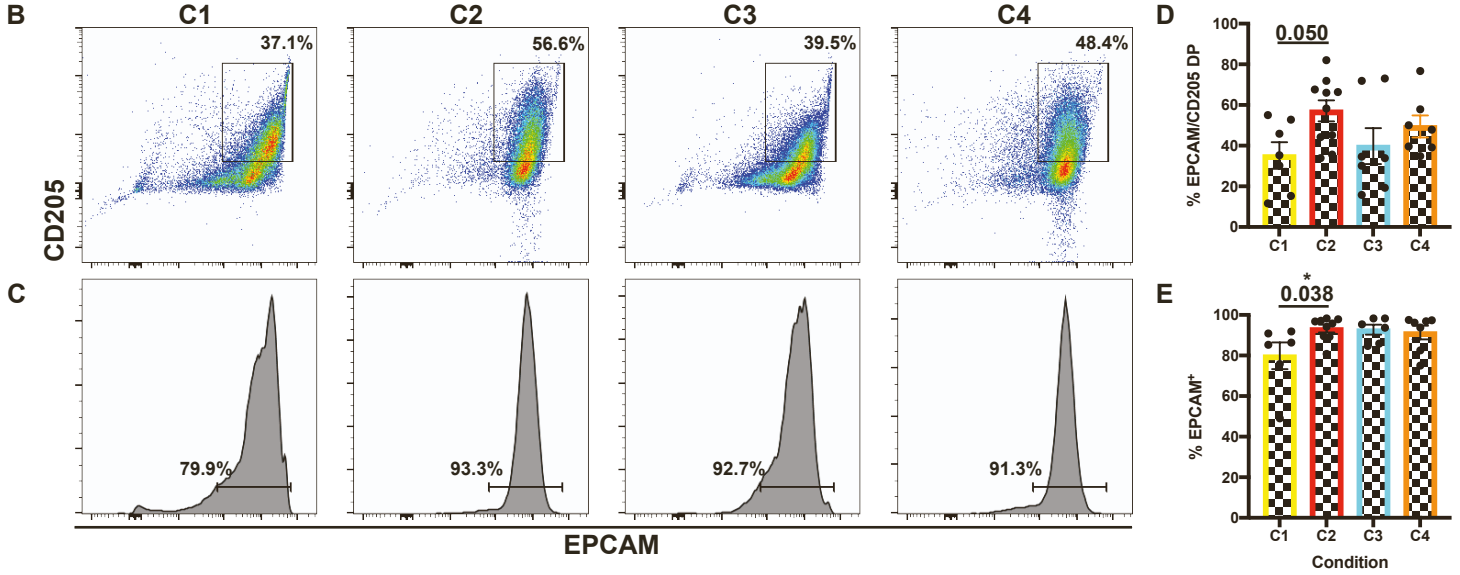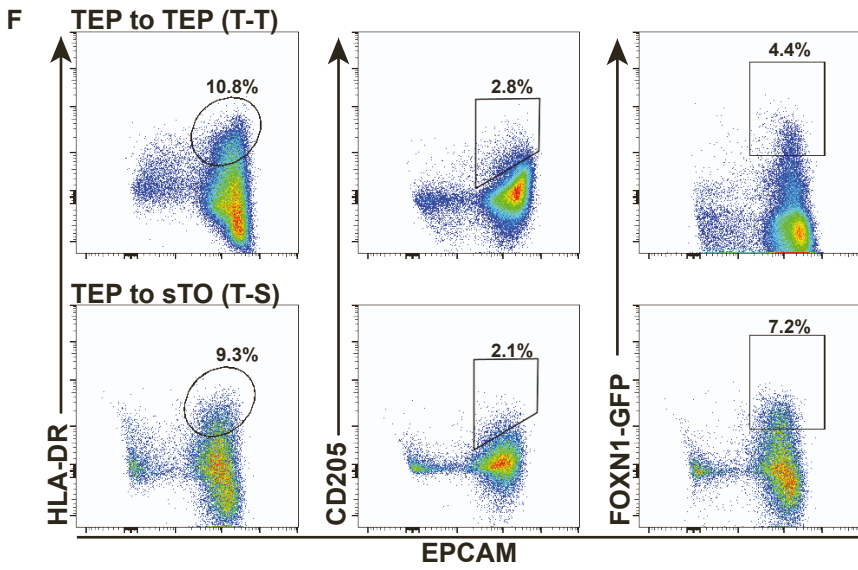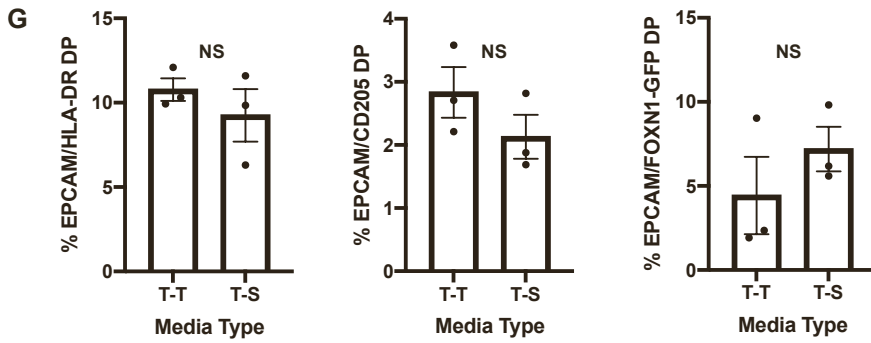

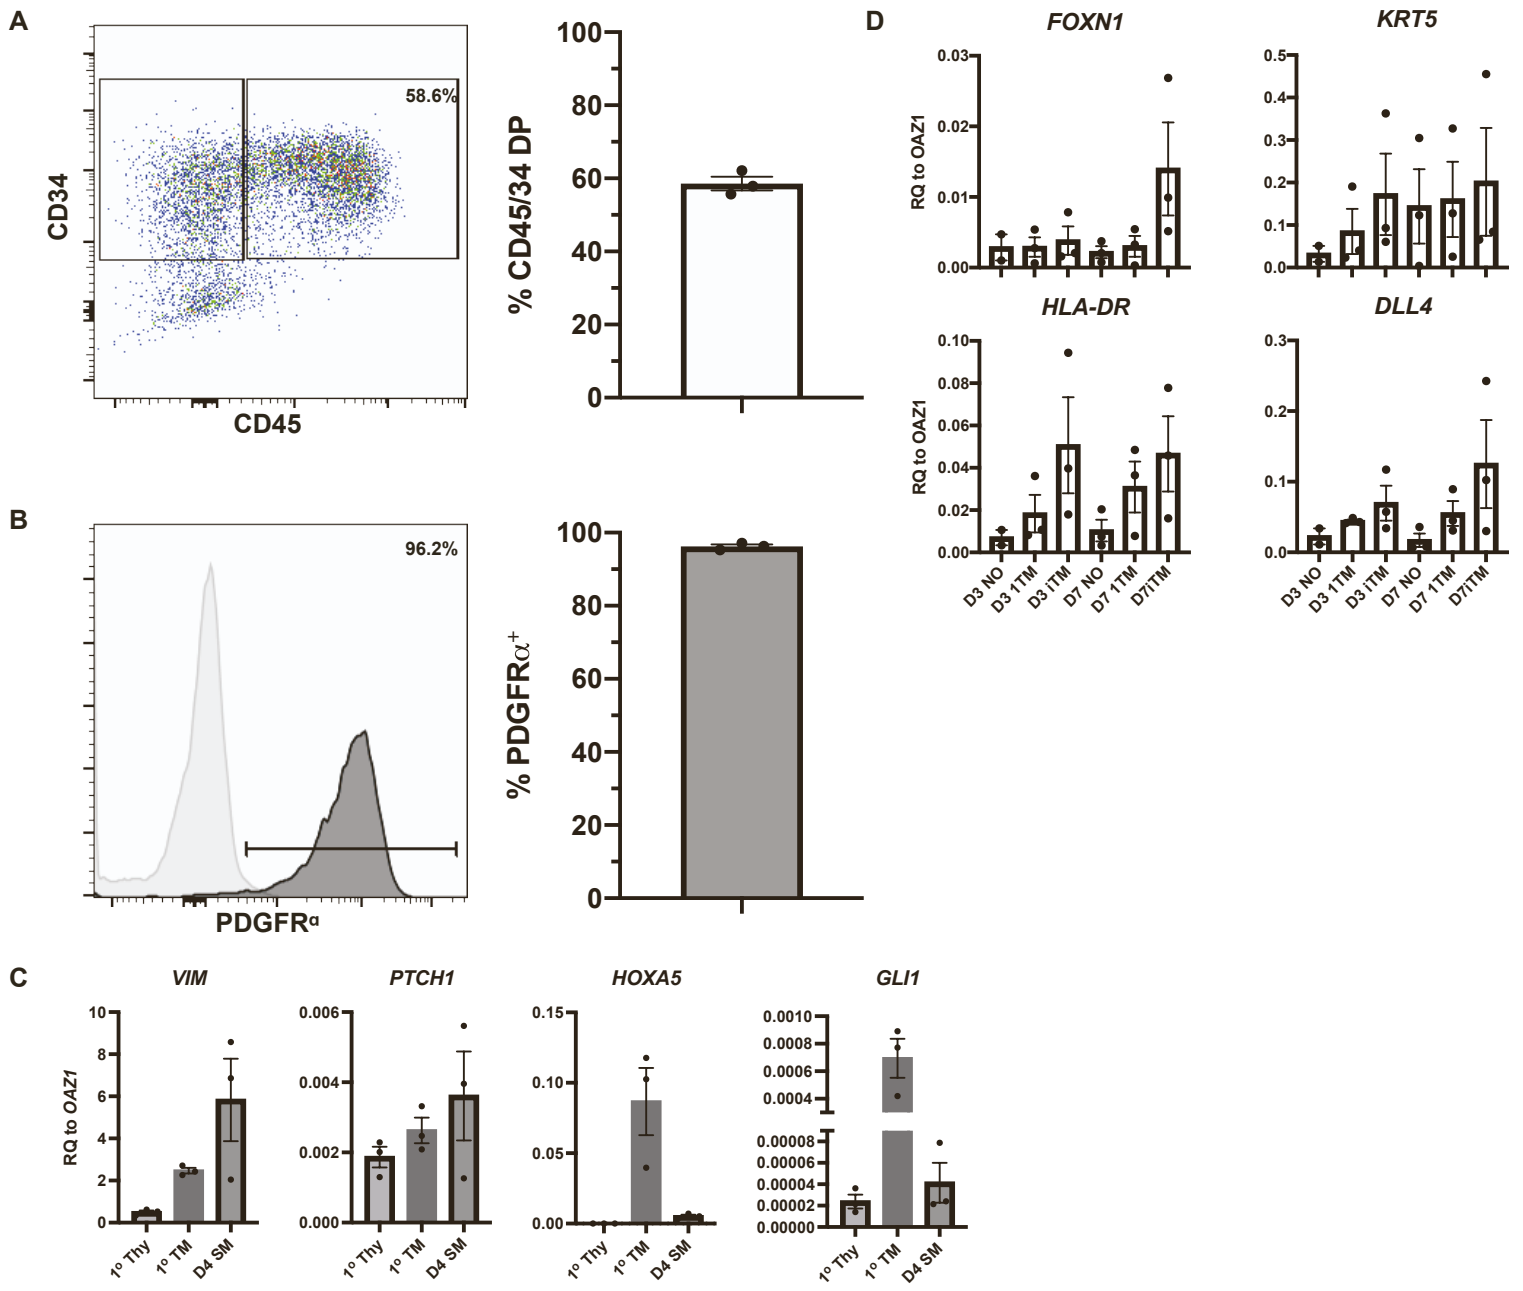

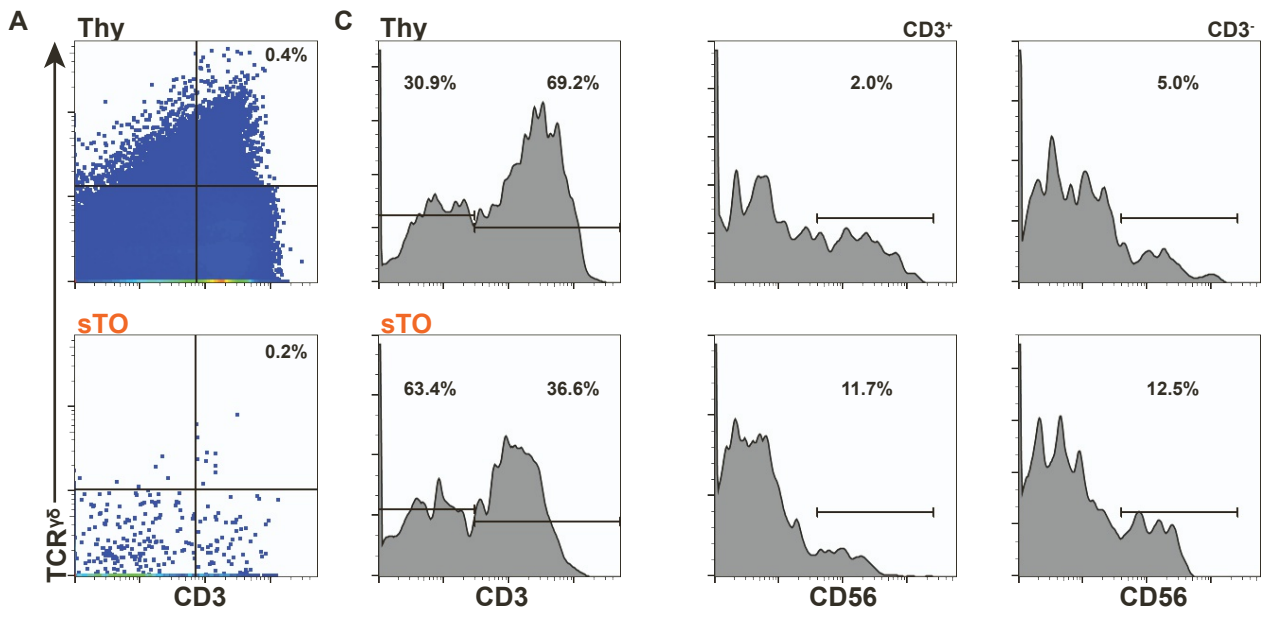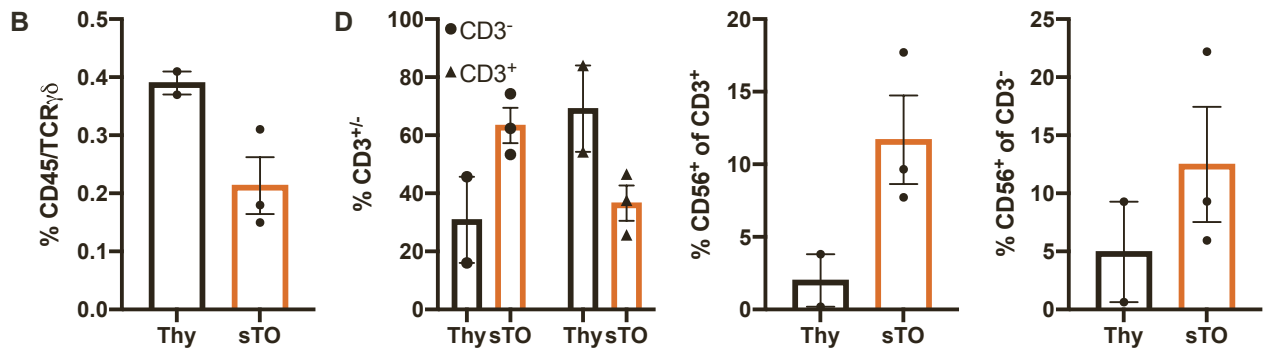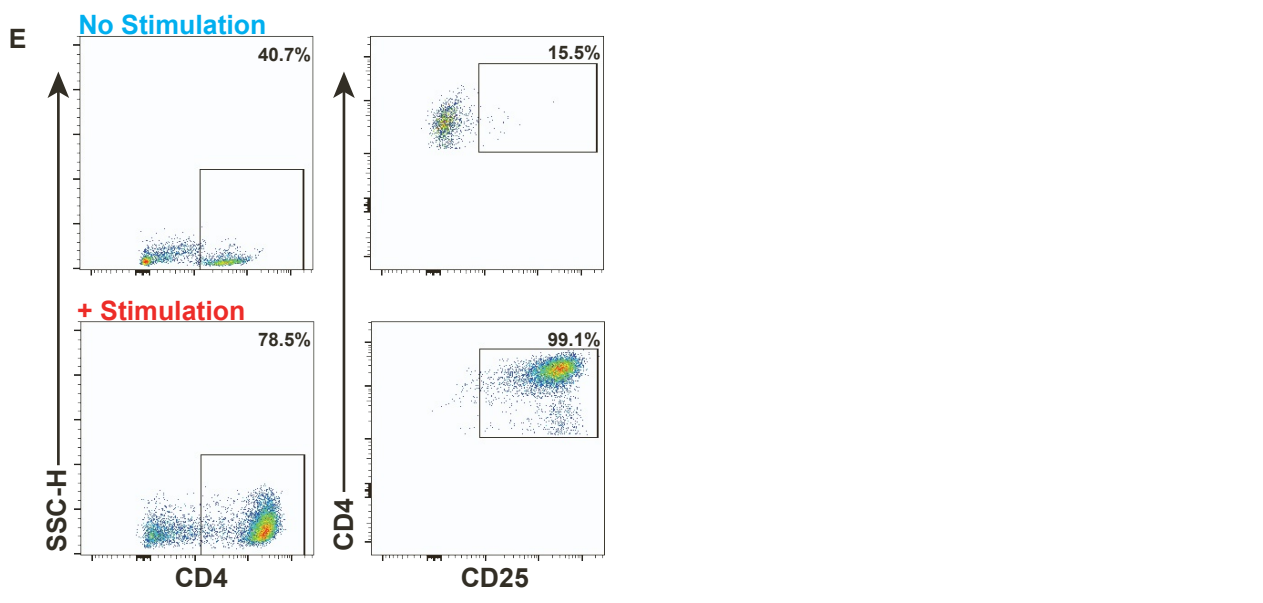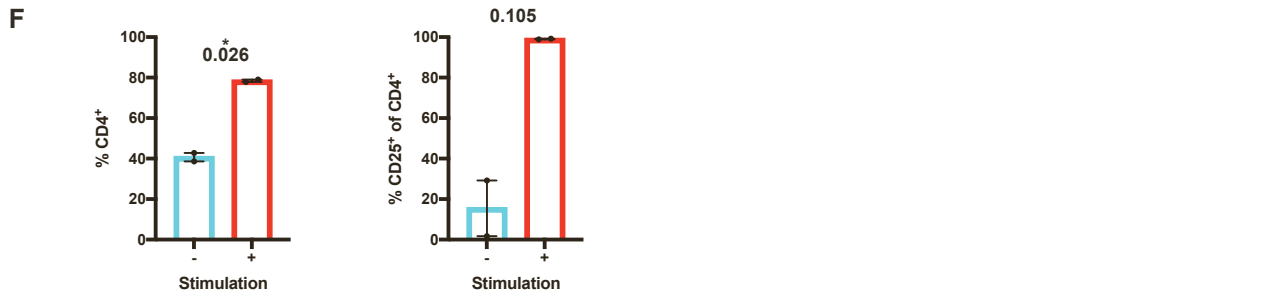

## Supplementary Figure Legends

### **Fig. S1. Modulation of culture conditions for TEP and sTO differentiation; related to**

**figure 1 and 2.** (A) Table of TEP differentiation conditions tested. (B-C) Representative FC plots of EPCAM/CD205 (B) and EPCAM (C) expression and quantification on ~day 20 TEPs (n=7-10, 4 hPSC lines). (D-E) Quantification of EPCAM/CD205 DP (D) and EPCAM (E) expression corresponding to (B) and (C), respectively. P-values determined by t-test comparing previously published condition (1) to optimized condition (2). FC plots (F) and quantification (G) of EPCAM, HLA-DR, CD205, and GFP expression in TEPs cultured in final stage TEP media or sTO media for 2 weeks past ~d20 (n=3) without air liquid interface culture. This analysis shows no significant effect on TEC marker expression by different medias. Plots depict percent mean; data shown as mean±SEM.

### **Fig. S2. Directed differentiation of hPSCs to multiple cellular lineages, related to figure 3.**

(A) FC analysis of CD34/CD45 expression on hPSC-derived HPCs (n=3, 3 hPSC lines). (B) FC analysis of PDGFR $\alpha$  on hPSC-derived splanchnic mesenchyme (n=3, 3 hPSC lines). Light grey histogram represents unstained control. (C) qPCR analysis of splanchnic mesoderm (SM) markers in primary whole thymus and expanded mesenchyme and day 4 SM (n=3; 3 hPSC lines) (D) qPCR analysis of TEC markers in day 3 and 7 TEP-only sTOs with either no mesenchyme, 1 $^{\circ}$  mesenchyme, or hPSC-derived mesenchyme. Plots depict percent mean; bar graphs show mean±SEM.

### **Fig. S3. sTOs support development of multiple immune cell types, related to figure 4.**

(A-B) CyTOF plots (A) and quantification (B) of CD3/TCR $\gamma\delta$  expressing  $\gamma\delta$  T cells in primary thymi and sTOs (n=2 thymi, 3 sTOs). (C, D) CyTOF plots (C) and quantification (D) of CD3 $^{+/-}$  cells and corresponding CD3/CD56 DP iNKT and CD3 $^{-}$ /CD56 $^{+}$  NK cells in primary thymi and sTOs (n=2

thymi, 3 sTOs). Plots depict percent mean; data shown as mean $\pm$ SEM. **(E)** FC plots and quantification of CD4 and CD25 expression of PBMCs activated with anti-CD3/CD28 Dynabeads (n=2).

**Supplementary Tables:**

| <b>Factor</b>                     | <b>Concentration</b> | <b>Day</b> | <b>Supplier</b>            |
|-----------------------------------|----------------------|------------|----------------------------|
| A=ActA                            | 100ng/ml             | 0-4        | R&D Systems                |
| Wnt3a                             | 50 ng/ml             | 0          | R&D Systems and Bio-Techne |
| ITS                               | 1:5000               | 0          | Thermo Electron            |
| ITS                               | 1:2000               | 1-4        | Thermo Electron            |
| R=TTNPB                           | 6 $\mu$ M            | 4          | R&D Systems                |
| B=BMP4                            | 20ng/ml              | 5-8        | R&D Systems                |
| LY=LY364947                       | 5 $\mu$ M            | 5-8        | R&D Systems                |
| SAG                               | 100ng/mL             | 5-8        | R&D Systems                |
| A=ActA                            | 20ng/ml              | 9+         | R&D Systems                |
| F=FGF8b                           | 50ng/ml              | 9+         | PeptoTech                  |
| LDN=LDN193189                     | 500nM                | 9+         | Stemcell Technologies      |
| R=TTNPB                           | 6 $\mu$ M            | 9+         | R&D Systems                |
| S1=SANT1                          | 0.25 $\mu$ M         | 9+         | Tocris                     |
| Wnt3a                             | 50 ng/ml             | 9+         | R&D Systems and Bio-Techne |
| ITS= insulin-transferrin-selenium | 1:2000               | 9+         | Thermo Electron            |
| Ascorbic Acid                     | 50 $\mu$ g/ml        | 9+         | Sigma-Aldrich              |
| EGF                               | 20ng/ml              | 9+         | R&D Systems                |
| Heparin                           | 10 $\mu$ g/ml        | 9+         | Sigma-Aldrich              |
| Hydrocortisone                    | 0.5 $\mu$ g/ml       | 9+         | Sigma-Aldrich              |
| ITS                               | 1:2000               | 9+         | Thermo Electron            |
| Non-Essential Amino Acids         | 1:100                | 9+         | Thermo Fisher Scientific   |
| Trolox                            | 0.1mM                | 9+         | Millipore Sigma            |

**Table S1: Factors, concentrations, and days for hPSCs to TEP differentiation.**

| <b>Factor</b> | <b>Concentration</b> | <b>Day</b> | <b>Supplier</b>         |
|---------------|----------------------|------------|-------------------------|
| A=ActA        | 30ng/ml              | 0          | R&D Systems             |
| B=BMP4        | 40ng/ml              | 0          | R&D Systems             |
| C=Chir        | 6 $\mu$ M            | 0          | Bio-Techne              |
| F=FGF2        | 20ng/ml              | 0-4        | R&D Systems             |
| P=PIK90       | 100nM                | 0          | Cayman Chemical Company |
| A83-A8301     | 1 $\mu$ M            | 1-4        | MedChem Express         |
| B=BMP4        | 30ng/ml              | 1-4        | R&D Systems             |
| C59           | 1 $\mu$ M            | 1-4        | Cellagen Technologies   |
| R=TTNPB       | 6 $\mu$ M            | 2-4        | R&D Systems             |

**Table S2: Factors, concentrations, and days for hPSC to splanchnic mesoderm differentiation.**



| <b>Factor</b>             | <b>Concentration</b> | <b>Stage</b> | <b>Day</b> | <b>Supplier</b>          |
|---------------------------|----------------------|--------------|------------|--------------------------|
| IMDM/F12                  |                      |              |            | Thermo Fisher Scientific |
| Hybridoma Mix             | 4%                   | Base Media   |            | Thermo Fisher Scientific |
| Human Serum               | 0.1%                 | Base Media   |            | Gemini                   |
| Polyvinyl alcohol         | 0.1%                 | Base Media   |            | Sigma-Aldrich            |
| Methyl cellulose          | 0.1%                 | Base Media   |            | Sigma-Aldrich            |
| GlutaMAX                  | 1x                   | Base Media   |            | Thermo Fisher Scientific |
| Ascorbic acid-2-phosphate | 50ug/ml              | Base Media   |            | Sigma-Aldrich            |
| ITSE AF                   | 1:1000               | Base Media   |            | Invitria                 |
| Lipid Mixture 1           | 1x                   | Base Media   |            | Sigma-Aldrich            |
| P/S                       | 1x                   | Base Media   |            | Thermo Fisher Scientific |
| BME                       | 22uM                 | Base Media   |            | Thermo Fisher Scientific |
| Rock Inhibitor            | 10uM                 | I            | 0          | R&D Systems              |
| CHIR                      | 0.5uM                | I            | 0          | Bio-Techne               |
| Activin A                 | 10ng/ml              | I            | 0          | R&D Systems              |
| BMP4                      | 20ng/ml              | I            | 0          | R&D Systems              |
| SCF                       | 20ng/ml              | I            | 0          | PeproTech                |
| VEGF                      | 20ng/ml              | I            | 0          | PeproTech                |
| FGF2                      | 10ng/ml              | I            | 0          | R&D Systems              |
| CHIR                      | 0.5uM                | II           | 1          | Bio-Techne               |
| Activin A                 | 10ng/ml              | II           | 1          | R&D Systems              |
| BMP4                      | 20ng/ml              | II           | 1          | R&D Systems              |
| SCF                       | 20ng/ml              | II           | 1          | PeproTech                |
| VEGF                      | 20ng/ml              | II           | 1          | PeproTech                |
| FGF2                      | 10ng/ml              | II           | 1          | R&D Systems              |
| CHIR                      | 3uM                  | III          | 2-3        | Bio-Techne               |
| SB                        | 3uM                  | III          | 2-3        | STEMCELL Technologies    |
| Activin A                 | 10ng/ml              | III          | 2-3        | R&D Systems              |
| BMP4                      | 20ng/ml              | III          | 2-3        | R&D Systems              |
| SCF                       | 20ng/ml              | III          | 2-3        | PeproTech                |
| VEGF                      | 20ng/ml              | III          | 2-3        | PeproTech                |
| FGF2                      | 10ng/ml              | III          | 2-3        | R&D Systems              |
| BMP4                      | 20ng/ml              | IV           | 4-7        | R&D Systems              |
| SCF                       | 50ng/ml              | IV           | 4-7        | PeproTech                |
| VEGF                      | 50ng/ml              | IV           | 4-7        | PeproTech                |
| IGF-II                    | 20ng/ml              | IV           | 4-7        | PeproTech                |
| FGF2                      | 10ng/ml              | IV           | 4-7        | PeproTech                |
| SCF                       | 100ng/ml             | V            | 8+         | PeproTech                |

|       |         |   |    |           |
|-------|---------|---|----|-----------|
| VEGF  | 50ng/ml | V | 8+ | PeproTech |
| FGF2  | 10ng/ml | V | 8+ | PeproTech |
| IL7   | 20ng/ml | V | 8+ | PeproTech |
| FLT3L | 10ng/ml | V | 8+ | PeproTech |

**Table S3: Factors, concentrations, differentiation stages, and days for HPC differentiation.**

| Antigen        | Conjugate   | Dilution | Supplier                    | Cat #       |
|----------------|-------------|----------|-----------------------------|-------------|
| CD3            | PE          | 1:100    | Biologend                   | 317308      |
| CD3            | APC-Cy7     | 1:100    | Biologend                   | 344818      |
| CD4            | AF647       | 1:100    | Biologend                   | 300520      |
| CD5            | APC-Cy7     | 1:180    | Biologend                   | 364010      |
| CD7            | FITC        | 1:60     | Biologend                   | 343104      |
| CD7            | PE-Cy7      | 1:60     | Biologend                   | 343114      |
| CD8            | AF488       | 1:100    | Biologend                   | 300916      |
| CD8            | PE-Cy5      | 1:100    | Biologend                   | 300910      |
| CD25           | APC-Cy7     | 1:20     | Biologend                   | 302614      |
| CD34           | BV421       | 1:40     | Biologend                   | 343610      |
| CD45           | BV510       | 1:180    | Biologend                   | 304036      |
| CD45           | PerCP       | 1:180    | Biologend                   | 304017      |
| CD104          | FITC        | 1:50     | Biologend                   | 327806      |
| CD104          | PE          | 1:50     | Biologend                   | 327808      |
| C127           | AF700       | 1:50     | Biologend                   | 351344      |
| CD205          | PerCP-Cy5.5 | 1:50     | Biologend                   | 342210      |
| EPCAM          | AF700       | 1:50     | eBioscience                 | 56-9326-42  |
| PD1            | AF405       | 1:50     | R&D Systems                 | 1615114     |
| HLA-DR         | BV421       | 1:50     | Biologend                   | 307636      |
| AIRE           |             | 1:100    | eBioscience                 | 13-9534-82  |
| CD3            |             | 1:100    | Abcam                       | ab5690      |
| CD205          |             | 1:100    | Thermo Fisher               | MA5-34695   |
| EPCAM          |             | 1:200    | Biologend                   | 324202      |
| HLA Class II   |             | 1:50     | Biologend                   | 361708      |
| KRT5           |             | 1:100    | Abcam                       | ab52635     |
| KRT5           |             | 1:100    | Sigma Aldrich               | 305R-14     |
| KRT8           |             | 1:100    | Santa Cruz<br>Biotechnology | 300910      |
| PD-1           |             | 1:50     | Abcam                       | ab237728    |
| PDGFR $\alpha$ |             | 1:500    | Abcam                       | ab203491    |
| TE-7           |             | 1:100    | Novus Biologics             | NBP2-50082  |
| CD4            | 166Er       |          | Miltenyi                    | 130-122-283 |
| CD45           | 89Y         |          | Fluidigm                    | 3089003B    |

|                     |       |  |                |             |
|---------------------|-------|--|----------------|-------------|
| CD56                | 161Dy |  | Miltenyi       | 130-108-016 |
| CD117               | 175Lu |  | Biolegend      | 313202      |
| CD326               | 141Pr |  | Fluidigm       | 3141006B    |
| FOXP3               | 162Dy |  | Fluidigm       | 3162011A    |
| HLA-DR              | 174Yb |  | Miltenyi       | 130-122-299 |
| TCF1                | 163Dy |  | Cell Signaling | 2203S       |
| TCR $\gamma/\delta$ | 169Tm |  | Miltenyi       | 130-122-291 |
| TdT                 | 164Dy |  | Fluidigm       | 3164015B    |
| KRT8                | 152Sm |  | R&D systems    | MAB3165     |

**Table S4: Antibodies used for flow cytometry, immunofluorescence, and CyTOF analysis.**

| <b>qPCR Probes/Primers</b> |                             |
|----------------------------|-----------------------------|
| <b>Target</b>              | <b>Assay ID/Sequence</b>    |
| AIRE                       | Bio-Rad: qHsaCIP0029272     |
| DLL4                       | Bio-Rad: qHsaCEP0051500     |
| FOXP1                      | ThermoFisher: Hs00919266_m1 |
| HLA-DRA                    | Bio-Rad: qHsaCEP0040019     |
| KRT5                       | Bio-Rad: qHsaCEP0055058     |
| KRT8                       | Bio-Rad: qHsaCEP0041467     |
| OAZ1                       | ThermoFisher: Hs00427923_m1 |
| ACTB F                     | CATGTACGTTGCTATCCAGGC       |
| ACTB R                     | CTCCTTAATGTCACGCACGAT       |
| Pro-Insulin F              | GCAGCCTTTGTGAACCAACAC       |
| Pro-Insulin R              | CCCCGCACACTAGGTAGAGA        |
| Islet Antigen 2 F          | CGGGACACATGATTCTGGCAT       |
| Islet Antigen 2 R          | CTGCTTGGTAGGCACAGAGG        |
| GAD1 F                     | GCGGACCCCAATACCACTAAC       |
| GAD1 R                     | CACAAGGCGACTCTTCTCTTC       |
| MBP F                      | GGCCGGACCCAAGATGAAA         |
| MBP R                      | CCCAGCTAAATCTGCTCAGG        |
| TG F                       | AGACACCTCCTACCTCCCTCA       |
| TG R                       | TCCTTGGACATCGCTTTGGC        |

**Table S5: Taqman probes and qPCR primer sequences for qPCR analysis.**
